# Supplementary material for: Some Structural Aspects of Language Are More Stable than Others: A Comparison of Seven Methods
Source: PubMed Central journal article supplement (PMC3557264; doi:10.1371/journal.pone.0055009), 2013-01-28
Supplement: pone.0055009.s001.pdf [file pone.0055009.s001.pdf]

# Some Structural Aspects of Language are More Stable than Others: A Comparison of Seven Methods

– Supporting Online Information –

Dan Dediu<sup>1,2,\*</sup>, Michael Cysouw<sup>3</sup>

**1** Language and Genetics Department, Max Planck Institute for Psycholinguistics,  
Nijmegen, The Netherlands

**2** Donders Institute for Brain, Cognition and Behaviour, Nijmegen, The Netherlands

**3** Forschungszentrum Deutscher Sprachatlas, Philipps Universität Marburg, Germany

\* E-mail: Dan.Dediu@mpi.nl

## Methods S1. Elena Maslova’s estimation of transition probabilities

### Introduction

We present here in detail the derivation of Elena Maslova’s estimation of transition probabilities (denoted **M** in our paper), as well as some possible extensions. A more general introduction can be found in [1]. This presentation is based on [2–5] and on personal communication between Cysouw and Maslova in 2006. The technical details of Maslova’s proposals are not easily extractable from her publications, and because there is still no detailed description from her own hand we decided to publish our rendition of her ideas here. As is discussed in the main paper, Maslova’s approach can be seen as a simplified formalisation of the method used in [6] (denoted **D** in our paper) and empirically strongly correlated to it. Considering that Maslova’s approach is much easier to handle, as both the empirical prerequisites (i.e. only pairs of related languages are necessary) and the mathematical calculations (i.e. only some quadratic equations have to be solved) are simpler, we propose that Maslova’s approach can be used to quickly obtain approximate estimates of transition probabilities.

### Assumptions

Consider a typology of languages for a particular feature. To estimate the *transition probabilities*, we will restrict ourselves here to features with two possible types only, A and B. Languages have to be either of type A or of type B, nothing else is allowed (but see Section for extensions of this restriction). This restriction to binary features immediately implies that the fraction of languages of type A is the complement of the fraction of languages of type B. Or, stated in terms of probabilities:

$$P(A) + P(B) = 1 \tag{1}$$

where  $P(A)$  and  $P(B)$  are the fraction of languages of type A and B, respectively.

Within a period of time  $t$ , ranging from  $t_0$  to  $t_1$ , we attempt to estimate the probability that languages will change from A to B, or vice versa from B to A. We do not make any assumptions concerning the *causes* of such changes: they can be due to internal developments within the language or to external influences (such as contact with another languages); from the current method’s point of view these distinctions are irrelevant.

Let  $p_{AB}$  be the probability that a language of type A changes to type B within the timeframe  $t$ . Likewise, let  $p_{BA}$  be the probability of a change from B to A. These two probabilities are independent of each other. The complement of  $p_{AB}$ , viz.  $1 - p_{AB}$ , can be interpreted as the probability that a language of type A does not change to type B within the timeframe  $t$ . Likewise, the complement of  $p_{BA}$ , viz.  $1 - p_{BA}$ , is the probability that a language of type B does not change to A.

Of course, within the timeframe  $t$  a language might change from A to B and back to A ( $A \rightarrow B \rightarrow A$ ), in which case it would be included in the  $1 - p_{AB}$  because, at the end of  $t$ , it would still be of type A. This applies to any odd number of changes ( $A \rightarrow B \rightarrow \dots \rightarrow B \rightarrow A$ ) and shows that (i)  $t$  must be short enough such that such *reversals* to the original value are not too frequent, and (ii) that this method is unable to account for reversals, as opposed to more advanced likelihood and Bayesian phylogenetic methods [7, 8]. The necessary assumption that the period  $t$  is short is a limiting factor on Maslova’s approach. However, in practice there is not much accepted knowledge about deep phylogenies in linguistics anyway, so empirically linguists will mostly work within groups of closely related languages, or even with variation between dialectal variants.

Assuming that these transition probabilities *remain the same* over longer periods of time, then it is possible to predict the stable distributions of the types A and B, i.e. the situation in which the fraction of languages of type A and B does not change:  $P_{t_1}(A) = P_{t_0}(A)$  and  $P_{t_1}(B) = P_{t_0}(B)$ . Such a stable situation does not mean that there are no changes anymore; it means that the number of changes cancel out against each other. The crucial assumption that the transition probabilities themselves remain stable is of course far from proven. It might very well be the case that even these probabilities have changed over time. Still, the assumption of universal transition probabilities represents a step forward from the common practice of linguistic typology to assume universal empirical frequencies [1].

## Basic implications

Concretely, in a stable distribution  $P_S$  there are equally many languages changing from A to B as there are languages changing from B to A within a particular period of time, so:

$$P_S(A) \cdot p_{AB} = P_S(B) \cdot p_{BA} \quad (2)$$

Using (1) and (2), the fractions of languages of type A and type B in the stable distribution can be predicted from the transition probabilities:

$$\begin{aligned} P_S(A) &= \frac{p_{BA}}{p_{AB} + p_{BA}} \\ P_S(B) &= \frac{p_{AB}}{p_{AB} + p_{BA}} \end{aligned} \quad (3)$$

Further, the complement of the average of the transition probabilities, i.e.  $1 - \frac{p_{AB} + p_{BA}}{2}$  can be interpreted as *stability*, i.e. the probability that there will be no change in a particular period. A high value indicates that few languages will change, which means that the characteristic is very stable. Conversely, a low average probability is indicative that a characteristic is highly unstable. However, as discussed above, this interpretation crucially hangs on the absence of hidden reversals within the timeframe  $t$  and thus on the careful choice of  $t$ .

Finally, the expected fraction of languages of type A and type B at the end of a period  $t$  can be predicted from the fractions at the start of the period. Namely, the languages of type A at the end of the period  $P_{t_1}(A)$  will consist of those languages that were of type A at the start of the period  $P_{t_0}(A)$  which did not change to B, i.e. with probability of  $1 - p_{AB}$ , together with those languages that were of type B at the start of the period  $P_{t_0}(B)$  which did change to A, i.e. with probability  $p_{BA}$ . The same holds reversely for  $P_{t_1}(B)$ .

$$\begin{cases} P_{t_1}(A) = P_{t_0}(A) \cdot (1 - p_{AB}) + P_{t_0}(B) \cdot p_{BA} \\ P_{t_1}(B) = P_{t_0}(A) \cdot p_{AB} + P_{t_0}(B) \cdot (1 - p_{BA}) \end{cases} \quad (4)$$

Using (1), these equations can be inverted to expressions of the fractions at the beginning of the period in terms of the fractions at the end of the period (we will need this in the next section for the estimation

of the transition probabilities), e.g. for type A:

$$\begin{aligned}
 P_{t_1}(A) &= P_{t_0}(A) \cdot (1 - p_{AB}) + P_{t_0}(B) \cdot p_{BA} \\
 P_{t_1}(A) &= P_{t_0}(A) \cdot (1 - p_{AB}) + [1 - P_{t_0}(A)] \cdot p_{BA} \\
 P_{t_1}(A) &= P_{t_0}(A)(1 - p_{AB} - p_{BA}) + p_{BA} \\
 \frac{P_{t_1}(A) - p_{BA}}{1 - p_{AB} - p_{BA}} &= P_{t_0}(A)
 \end{aligned} \tag{5}$$

Doing this likewise for type B results in:

$$\begin{cases} P_{t_0}(A) = \frac{P_{t_1}(A) - p_{BA}}{1 - p_{AB} - p_{BA}} \\ P_{t_0}(B) = \frac{P_{t_1}(B) - p_{AB}}{1 - p_{AB} - p_{BA}} \end{cases} \tag{6}$$

## Estimating transition probabilities

Linguists are often highly confident that certain languages are related, without necessarily being able to reach agreement on the details of the internal subgrouping of such a genealogical unit. Taking advantage of this empirical situation, we will only assume that (see also the discussion above):

1. there is a distinction between pairs of related vs. non-related languages (i.e. there are no detailed genealogical trees assumed)
2. the time-depth of split-up of related languages is relatively small, so that it is likely that there has maximally been one single change of type per language in that period (no reversals) and that there is a low probability that all related languages have changed.
3. all pairs of related languages have approximately the same time depth. In practice we used the genus-level as described in WALS as the maximum divergence time depth.

Given a sample of *pairs* of such related languages we can estimate the transition probabilities and the stability of the concerned features (see Section ) – the method we applied in this paper, and which amounts to the original proposal from Maslova. However, two interesting extensions are also possible: (a) we could look at *groups of three* of such related languages (see Section ) and (b) we could add to the sample of related pairs a third, non-related language but which is geographically close, allowing us to estimate the transition probabilities including borrowing events into the model (see Section ). Interestingly, the resulting formulas to estimate the transition probabilities in these cases only differ by a constant factor.

## Using genealogically closely related pairs

Given a pair of closely related languages, the method assumes that they both shared the same type at the start  $t_0$  of the period  $t$ . Either both languages are of type A, with probability  $P_{t_0}(A)$ , or both are of type B, with probability  $P_{t_0}(B)$ . Some changes might happen (or not) during the period  $t$ , resulting in a particular probability that both languages are still identical at the end  $t_1$  of the period  $t$ . This probability is called  $P_{t_1}(\textit{identical})$ . This probability is the sum of four possible histories: either both languages started off as type A and both did not change ( $AA_{t_0} \rightarrow AA_{t_1}$ ); or both started off as type A and both changed to B ( $AA_{t_0} \rightarrow BB_{t_1}$ ); or both started off as type B and both did not change ( $BB_{t_0} \rightarrow BB_{t_1}$ ); or, finally, both started off as type B and both changed to A ( $BB_{t_0} \rightarrow AA_{t_1}$ ). Note that the assumption of a short time-span  $t$  leads to the further assumption that the number of pairs that did not change ( $AA_{t_0} \rightarrow AA_{t_1}$  and  $BB_{t_0} \rightarrow BB_{t_1}$ ) will be larger than the number of pairs that changed completely ( $AA_{t_0} \rightarrow BB_{t_1}$  and  $BB_{t_0} \rightarrow AA_{t_1}$ ). This assumption will become important in the solving of

the equations (see Section ). Thus, the probability of pairs of languages being identical in a synchronic empirical collection of pairs can be expressed as:

$$P_{t_1}(\text{identical}) = P_{t_1}(I) = P_{t_0}(A) \cdot (1 - p_{AB})^2 + P_{t_0}(A) \cdot p_{AB}^2 + P_{t_0}(B) \cdot (1 - p_{BA})^2 + P_{t_0}(B) \cdot p_{BA}^2 \quad (7)$$

Using (1), this can be reformulated as an equation relating the fraction of identical pairs at the end of the period  $P_{t_1}(I)$  and the fraction of languages of type A at the beginning of the period  $P_{t_0}(A)$ :

$$\begin{aligned} P_{t_1}(I) &= P_{t_0}(A) \cdot [(1 - p_{AB})^2 + p_{AB}^2] + (1 - P_{t_0}(A)) \cdot [(1 - p_{BA})^2 + p_{BA}^2] \\ &= P_{t_0}(A) \cdot [(1 - p_{AB})^2 + p_{AB}^2 - (1 - p_{BA})^2 - p_{BA}^2] + (1 - p_{BA})^2 + p_{BA}^2 \end{aligned}$$

Using (6), the fraction of type A at the beginning of the period can be expressed in terms of the fraction of type A at the end of the period. Thus, both  $P(I)$  and  $P(A)$  in the equation are expressed at the same point in time, reducing the necessity for a subscript for time:

$$P(I) = \frac{P(A) - p_{BA}}{1 - p_{AB} - p_{BA}} \cdot [(1 - p_{AB})^2 + p_{AB}^2 - (1 - p_{BA})^2 - p_{BA}^2] + (1 - p_{BA})^2 + p_{BA}^2$$

This simplifies to

$$P(I) = P(A) \cdot 2(p_{BA} - p_{AB}) - 2p_{BA}(1 - p_{AB}) + 1$$

or, by defining  $P(D)$  as the complement of  $P(I)$ , i.e.  $P(D) = 1 - P(I)$ , this becomes

$$P(D) = 1 - P(I) = P(A) \cdot 2(p_{AB} - p_{BA}) + 2p_{BA}(1 - p_{AB}) \quad (8)$$

$P(D)$  is the frequency with which the languages within the pair are different. So, there should be a *linear dependency* between the frequency of pairs of languages being different,  $P(D)$ , and the frequency of languages of type A,  $P(A)$ , of the form  $P(D) = 2\alpha \cdot P(A) + 2\beta$ , with  $\alpha = p_{AB} - p_{BA}$  and  $\beta = p_{BA}(1 - p_{AB})$ . By empirically measuring  $P(D)$  and  $P(A)$  and by estimating the coefficients  $\alpha$  and  $\beta$  of the linear dependency, it is possible to estimate the transition probabilities (see Section for the practical details).

Note that it might seem to be even more interesting to consider a less constrained model, starting with two languages of any pair of types, AA, AB, BA, or BB. This would result in the following equation for  $P(I)$ :

$$\begin{aligned} P_{t_1}(I) &= P_{t_0}(A)^2 [(1 - p_{AB})^2 + p_{AB}^2] \\ &\quad + P_{t_0}(B)^2 [(1 - p_{BA})^2 + p_{BA}^2] \\ &\quad + 2 \cdot P_{t_0}(A) \cdot P_{t_0}(B) [p_{AB}(1 - p_{BA}) + p_{BA}(1 - p_{AB})] \end{aligned}$$

However, after performing the same algebra as above, all transition probabilities factor out, leaving just the evidently true, but useless, equation

$$P(I) = 2 \cdot P(A)^2 - 2 \cdot P(A) + 1 = P(A)^2 + P(B)^2$$

## Using genealogically closely related triples

There are various different settings that can be used to estimate the transition probabilities. However, most of them quickly become rather complex. The algebra of the following two settings also nicely reduces to a manageable model, being only slightly different from the previous one. These settings were not considered by Maslova herself, but added by the present authors.

Instead of looking at pairs of languages, one might also look at groups of three closely related languages. In that case the probability that all three languages are identical consists of four different possible histories ( $AAA_{t_0} \rightarrow AAA_{t_1}$ ,  $AAA_{t_0} \rightarrow BBB_{t_1}$ ,  $BBB_{t_0} \rightarrow BBB_{t_1}$  and  $BBB_{t_0} \rightarrow AAA_{t_1}$ ). This results in an equation very similar to (7):

$$P_{t_1}(I) = P_{t_0}(A) \cdot (1 - p_{AB})^3 + P_{t_0}(A) \cdot p_{AB}^3 \\ + P_{t_0}(B) \cdot (1 - p_{BA})^3 + P_{t_0}(B) \cdot p_{BA}^3$$

Performing the same algebra as in the previous section, this leads to:

$$P(D) = P(A) \cdot 3(p_{AB} - p_{BA}) + 3p_{BA}(1 - p_{AB}) \quad (9)$$

i.e. exactly the same formula as in (8), though with a constant 3 instead of 2. Note that this *does not* generalize to larger groups, i.e. for groups with five languages it does not work to replace the constant with a 5. All groups higher than three languages lead to much more complex algebra and thus are not usable as a quick approximation (which is the goal of the present method).

### Using geographically close, but genealogically unrelated pairs

In this extension of Maslova’s approach we again consider two closely related languages, but now we add a third non-related language that is geographically close to one (and only one) of the two related languages. We are interested in situations where the two related languages are of a different type, but the two non-related yet geographically close languages are of the same type. Such a situation is typically interpreted as the result of contact-induced change in one of the geographically close languages. However, there are various histories possible that lead to this setting.

We assume, as before, that at the start  $t_0$  of the period  $t$  the two related languages are of the same type, so either both are of type A, with probability  $P_{t_0}(A)$ , or both are of type B, with probability  $P_{t_0}(B)$ . The non-related third language can also be of either type (with the same probabilities), so there are four possible start settings: AA-A, AA-B, BB-A, and BB-B (the non-related, but geographically close language is shown separated by a dash). We are interested in end situations in which the two related languages are of different types, but the two geographically close language are of the same type: AB-B and BA-A. The probability for any of these situations to occur will be denoted  $P(C)$ , where the ‘C’ mnemonically stands for ‘convergence’.

From each starting situation it is possible to arrive at both end situations, given the right changes. For example, to get from AA-A to AB-B requires two languages to change from A to B and one language to not change from type A. Writing out all eight such possibilities gives the following unwieldy formula:

$$P_{t_1}(C) = P_{t_0}(A)^2 [(1 - p_{AB})^2 p_{AB} + (1 - p_{AB}) p_{AB}^2] \\ + P_{t_0}(B)^2 [(1 - p_{BA})^2 p_{BA} + (1 - p_{BA}) p_{BA}^2] \\ + P_{t_0}(A) \cdot P_{t_0}(B) [p_{AB} p_{BA} (1 - p_{AB}) + p_{BA} (1 - p_{AB}) (1 - p_{BA})] \\ + P_{t_0}(A) \cdot P_{t_0}(B) [p_{AB} p_{BA} (1 - p_{BA}) + p_{AB} (1 - p_{AB}) (1 - p_{BA})]$$

However, this immediately reduces to

$$P_{t_1}(C) = P_{t_0}(A)^2 [(1 - p_{AB}) p_{AB}] \\ + P_{t_0}(B)^2 [(1 - p_{BA}) p_{BA}] \\ + P_{t_0}(A) \cdot P_{t_0}(B) [(1 - p_{AB}) p_{AB}] \\ + P_{t_0}(A) \cdot P_{t_0}(B) [(1 - p_{BA}) p_{BA}]$$

Combining terms, and using the complementarity of  $P(A)$  and  $P(B)$ , this reduces to

$$P_{t_1}(C) = P_{t_0}(A) [(1 - p_{AB})p_{AB} - (1 - p_{BA})p_{BA}] + (1 - p_{BA})p_{BA}$$

Using (6), the probability  $P_{t_0}(A)$  can be expressed by using only the probability  $P_{t_1}(A)$ , so the time-subscripts are identical and can thus be left out:

$$P(C) = \frac{P(A) - p_{BA}}{1 - p_{AB} - p_{BA}} \cdot [(1 - p_{AB})p_{AB} - (1 - p_{BA})p_{BA}] + (1 - p_{BA})p_{BA}$$

which reduces nicely to

$$P(C) = P(A) \cdot (p_{AB} - p_{BA}) + p_{BA}(1 - p_{BA}) \quad (10)$$

So, again there is the same *linear dependency* between the probability that the two unrelated languages are identical while the two related languages are different,  $P(C)$ , and the empirical probability of languages being of type A,  $P(A)$ . The only difference between (10) and the earlier results in (8) and (9) is the constant. By estimating the coefficients, it is possible to estimate the transition probabilities, and from that the stable distribution and the stability of the feature.

## Empirically estimating the transition probabilities using *WALS*

In the main part of this paper, we applied the method described in Section to the data of the *World Atlas of Language Structures* (WALS) [9] in order to obtain estimates of the stability of the structural features of language covered in this database. The actual R code (released under a GPL v3 license) is given below.

For *any given feature* in WALS,  $F$  with  $n \geq 2$  values  $V_1, \dots, V_n$ , we estimated separately the transition probabilities for each of its values,  $V_i$  such that with the previous notations A is  $V_i$  and B represents all other values except for  $V_i$ . Thus, for *each value*  $V_i$  we estimated the transition probabilities from  $V_i$  to any other possible value,  $p_{ABi}$ .

The basic idea is the following. For a specific value A we select pairs of languages of the same genus from WALS. All those pairs are separated into two different samples, for convenience called sample 1 and sample 2 here. For each of these samples, we count how many pairs are not identical (so, one of the two languages has value A, the other has not value A). The proportions of different pairs for the two samples are  $P(D_1)$  and  $P(D_2)$ . Further, for both samples we count the number of languages that have value A. The proportions of value for the two samples are  $P(A_1)$  and  $P(A_2)$ . From equation (8) we then have:

$$\begin{cases} P(D_1) = 2\alpha P(A_1) + 2\beta \\ P(D_2) = 2\alpha P(A_2) + 2\beta \end{cases} \quad \text{with} \quad \begin{cases} \alpha = p_{AB} - p_{BA} \\ \beta = p_{BA}(1 - p_{AB}) \end{cases} \quad (11)$$

From the first two equations in (11) we can derive:

$$\alpha = \frac{1}{2} \cdot \frac{P(D_1) - P(D_2)}{P(A_1) - P(A_2)}$$

$$\beta = \frac{1}{2} \cdot \frac{P(A_1)P(D_2) - P(A_2)P(D_1)}{P(A_1) - P(A_2)}$$

And from the second two equations in (11) we can derive:

$$p_{AB} = \frac{1 + \alpha \pm \sqrt{(1 - \alpha)^2 - 4\beta}}{2}$$

$$p_{BA} = \frac{1 - \alpha \pm \sqrt{(1 - \alpha)^2 - 4\beta}}{2}$$

By filling in the four empirical estimates for  $P(D_1)$ ,  $P(D_2)$ ,  $P(A_1)$  and  $P(A_2)$  we can thus directly derive estimates for  $p_{AB}$  and  $p_{BA}$ . However, note that there are actually two solutions for  $p_{AB}$  and  $p_{BA}$ , one with lower transition probabilities (the ‘minus’ variant) and one with higher transition probabilities (the ‘plus’ variant), with  $p_{AB}^- = 1 - p_{BA}^+$  and vice versa. The interpretation of these two solutions can be understood from looking back at equation (7). The ‘minus’ solution represents the situation that the number of pairs that did not change ( $AA_{t_0} \rightarrow AA_{t_1}$  and  $BB_{t_0} \rightarrow BB_{t_1}$ ) is larger than the number of pairs that changed completely ( $AA_{t_0} \rightarrow BB_{t_1}$  and  $BB_{t_0} \rightarrow AA_{t_1}$ ). As was discussed in Section , this is the fitting interpretation to the assumption that the time period  $t$  is small. We will therefore use the ‘minus’ solution here.

Instead of using just two samples of pairs, as illustrated above, it is also possible to select many different samples. In fact, in order to estimate  $\alpha$  and  $\beta$  we used multiple sets of  $P(A)$  and  $P(D)$  for the same value. Our way of obtaining these multiple sets is by randomly subsampling the set of all available genera. For example, using WALs for feature 10 (*Vowel Nasalization*) and its value 1 (“Contrast present”), we have a total of 26 genera with enough data for this feature<sup>1</sup> We created 50 random subsets of 13 genera and for each such subset we computed the  $P(D)$  and  $P(A)$ , as exemplified in Table 1.

**Table 1.** Example  $P(A)$  and  $P(D)$  for feature 10 (*Vowel Nasalization*) in WALs. Each subset shown is composed of 13 random genera (here given by their alphabetical index, thus 1 represents *Adamawa-Ubangian*). As an example, we only show the first 10 subsets generated in one particular run.

| Subset                                          | $P(A)$ | $P(D)$ |
|-------------------------------------------------|--------|--------|
| 9, 11, 13, 18, 26, 10, 5, 23, 17, 7, 20, 25, 15 | 0.23   | 0.15   |
| 17, 2, 7, 8, 5, 26, 20, 22, 18, 23, 4, 25, 1    | 0.27   | 0.23   |
| 18, 19, 14, 11, 6, 25, 13, 17, 2, 22, 3, 12, 10 | 0.31   | 0.15   |
| 4, 5, 26, 2, 16, 24, 14, 10, 12, 25, 3, 1, 20   | 0.35   | 0.23   |
| 12, 9, 20, 11, 5, 24, 23, 22, 7, 1, 17, 6, 25   | 0.46   | 0.31   |
| 19, 8, 11, 14, 22, 21, 17, 6, 26, 16, 25, 2, 15 | 0.31   | 0.31   |
| 5, 1, 16, 6, 18, 25, 15, 8, 19, 13, 9, 23, 2    | 0.12   | 0.08   |
| 24, 14, 9, 1, 4, 11, 6, 16, 23, 10, 18, 20, 19  | 0.38   | 0.15   |
| 18, 26, 6, 4, 14, 12, 1, 13, 11, 8, 25, 20, 24  | 0.38   | 0.31   |
| 13, 25, 22, 3, 8, 14, 12, 4, 9, 21, 20, 2, 16   | 0.27   | 0.38   |

If we then regress  $P(D)$  to  $P(A)$  we obtain estimates of  $\alpha$  and  $\beta$  as the coefficients of this regression. In this example  $\alpha = 0.08$  (std. error 0.17) and  $\beta = 0.17$  (std. error 0.05). The error values show that these estimates are not completely random, though it should be noted that the errors are substantial. The estimates are thus to be interpreted with care. Still, proceeding with these estimated parameters we can estimate  $p_{AB} = 0.33$  and  $p_{BA} = 0.25$ . Using the formula in (3) this implies that the stable distribution of  $P_S(A) = 0.43$ . Note that the actual frequency of vowel nasalization in WALs is only 26%, indicating that the current distribution is not in its stable state, and that there probably is influence from historical coincidences on the current world-wide distribution of vowel nasalisation. The stability of this characteristic is rather high, so languages do not seem to change too often, making it even more probable that the current distribution shows signs of historical events.

Further, we computed the stability of the feature  $F$  by taking the *weighted average* of the stability of each of its values  $V_i$  (defined as  $1 - p_{ABi}$ ), where the weights are represented by the relative frequencies

<sup>1</sup>The 26 genera are: *Adamawa-Ubangian*, *Algonquian*, *Athapaskan*, *Bantoid*, *Biu-Mandara*, *Bodic*, *Bongo-Bagirmi*, *Cariban*, *Eskimo-Aleut*, *Germanic*, *Gur*, *Kam-Tai*, *Kuki-Chin-Naga*, *Kwa*, *Madang*, *Northern Atlantic*, *Nupoid*, *Oceanic*, *Pama-Nyungan*, *Romance*, *Semitic*, *Southern Atlantic*, *Sundic*, *Tupi-Guaraní*, *Western Mande*, and *Yuman*.

of the feature values:

$$S(F) = \frac{1}{n} \sum_{i=1}^n (1 - p_{ABi}) P_i \quad (12)$$

where  $P_i$  is the frequency of value  $V_i$  relative to all the possible values of feature  $F$ . Thus, the stability of more frequent values have a bigger influence on estimating the frequency of the whole feature’s stability  $S(F)$ .

## The R code

This section contains the R code (released under GPL v3 and also reproduced in **Script S1**) implementing the estimation of stability (used in this paper) based on Elena Maslova’s method (as described above). Please note that depending on the version of the WALS database used results might differ slightly from the ones reported here, but for maximum reproducibility we also included the version of the WALS dataset we used as **Dataset S1** (released under an Attribution-NonCommercial-NoDerivs 2.0 Germany (CC BY-NC-ND 2.0) license [<http://creativecommons.org/licenses/by-nc-nd/2.0/de/deed.en>]; see the included ReadMe.txt for more details). Also, estimating the transition probabilities (lines 207-212) is very CPU-intensive. The symbols ↘ and ↙ mark the points where a long line breaks to fit the page.

```

1 #####
2 # Estimate and generalize Elena Maslova's "transition probabilities"
3 #
4 # Copyright (C) 2008–2012 Michael Cysouw & Dan Dediu
5 #
6 # This program is free software: you can redistribute it and/or modify
7 # it under the terms of the GNU General Public License as published by
8 # the Free Software Foundation, either version 3 of the License, or
9 # (at your option) any later version.
10 #
11 # This program is distributed in the hope that it will be useful,
12 # but WITHOUT ANY WARRANTY; without even the implied warranty of
13 # MERCHANTABILITY or FITNESS FOR A PARTICULAR PURPOSE. See the
14 # GNU General Public License for more details.
15 #
16 # You should have received a copy of the GNU General Public License
17 # along with this program. If not, see <http://www.gnu.org/licenses/>.
18 #
19 #####
20
21 # The working path:
22 working.path <- ".";
23
24 # Load the original WALS data as used in Dediu, D. & Cysouw, M. Some Structural ↘
25 ↙ Aspects of Language are More Stable than Others: A Comparison of Seven Methods. ( ↘
26 ↙ please make sure you have extracted it here):
27 source( paste( working.path, "/WALS R/wals.r", sep="" ), chdir=TRUE);
28 ## Please note that currently the WALS data is released in a slightly different format ↘
29 ↙ (see http://wals.info/export) and in order to import it you need to use instead ↘
30 ↙ something of the form:
31 ## but we did not test the script with this new format and it might require some ↘
32 ↙ tweaking.
33 #langs <- read.table("languages.tab", sep="\t", header=T)
34 #mat <- read.table("datapoints.tab", sep="\t", header=T, row.names=1)
35
36
37
38
39
40
41
42
43
44
45
46
47
48
49
50
51
52
53
54
55
56
57
58
59
60
61
62
63
64
65
66
67
68
69
70
71
72
73
74
75
76
77
78
79
80
81
82
83
84
85
86
87
88
89
90
91
92
93
94
95
96
97
98
99
100
101
102
103
104
105
106
107
108
109
110
111
112
113
114
115
116
117
118
119
120
121
122
123
124
125
126
127
128
129
130
131
132
133
134
135
136
137
138
139
140
141
142
143
144
145
146
147
148
149
150
151
152
153
154
155
156
157
158
159
160
161
162
163
164
165
166
167
168
169
170
171
172
173
174
175
176
177
178
179
180
181
182
183
184
185
186
187
188
189
190
191
192
193
194
195
196
197
198
199
200
201
202
203
204
205
206
207
208
209
210
211
212
213
214
215
216
217
218
219
220
221
222
223
224
225
226
227
228
229
230
231
232
233
234
235
236
237
238
239
240
241
242
243
244
245
246
247
248
249
250
251
252
253
254
255
256
257
258
259
260
261
262
263
264
265
266
267
268
269
270
271
272
273
274
275
276
277
278
279
280
281
282
283
284
285
286
287
288
289
290
291
292
293
294
295
296
297
298
299
300
301
302
303
304
305
306
307
308
309
310
311
312
313
314
315
316
317
318
319
320
321
322
323
324
325
326
327
328
329
330
331
332
333
334
335
336
337
338
339
340
341
342
343
344
345
346
347
348
349
350
351
352
353
354
355
356
357
358
359
360
361
362
363
364
365
366
367
368
369
370
371
372
373
374
375
376
377
378
379
380
381
382
383
384
385
386
387
388
389
390
391
392
393
394
395
396
397
398
399
400
401
402
403
404
405
406
407
408
409
410
411
412
413
414
415
416
417
418
419
420
421
422
423
424
425
426
427
428
429
430
431
432
433
434
435
436
437
438
439
440
441
442
443
444
445
446
447
448
449
450
451
452
453
454
455
456
457
458
459
460
461
462
463
464
465
466
467
468
469
470
471
472
473
474
475
476
477
478
479
480
481
482
483
484
485
486
487
488
489
490
491
492
493
494
495
496
497
498
499
500
501
502
503
504
505
506
507
508
509
510
511
512
513
514
515
516
517
518
519
520
521
522
523
524
525
526
527
528
529
530
531
532
533
534
535
536
537
538
539
540
541
542
543
544
545
546
547
548
549
550
551
552
553
554
555
556
557
558
559
560
561
562
563
564
565
566
567
568
569
570
571
572
573
574
575
576
577
578
579
580
581
582
583
584
585
586
587
588
589
590
591
592
593
594
595
596
597
598
599
600
601
602
603
604
605
606
607
608
609
610
611
612
613
614
615
616
617
618
619
620
621
622
623
624
625
626
627
628
629
630
631
632
633
634
635
636
637
638
639
640
641
642
643
644
645
646
647
648
649
650
651
652
653
654
655
656
657
658
659
660
661
662
663
664
665
666
667
668
669
670
671
672
673
674
675
676
677
678
679
680
681
682
683
684
685
686
687
688
689
690
691
692
693
694
695
696
697
698
699
700
701
702
703
704
705
706
707
708
709
710
711
712
713
714
715
716
717
718
719
720
721
722
723
724
725
726
727
728
729
730
731
732
733
734
735
736
737
738
739
740
741
742
743
744
745
746
747
748
749
750
751
752
753
754
755
756
757
758
759
760
761
762
763
764
765
766
767
768
769
770
771
772
773
774
775
776
777
778
779
780
781
782
783
784
785
786
787
788
789
790
791
792
793
794
795
796
797
798
799
800
801
802
803
804
805
806
807
808
809
810
811
812
813
814
815
816
817
818
819
820
821
822
823
824
825
826
827
828
829
830
831
832
833
834
835
836
837
838
839
840
841
842
843
844
845
846
847
848
849
850
851
852
853
854
855
856
857
858
859
860
861
862
863
864
865
866
867
868
869
870
871
872
873
874
875
876
877
878
879
880
881
882
883
884
885
886
887
888
889
890
891
892
893
894
895
896
897
898
899
900
901
902
903
904
905
906
907
908
909
910
911
912
913
914
915
916
917
918
919
920
921
922
923
924
925
926
927
928
929
930
931
932
933
934
935
936
937
938
939
940
941
942
943
944
945
946
947
948
949
950
951
952
953
954
955
956
957
958
959
960
961
962
963
964
965
966
967
968
969
970
971
972
973
974
975
976
977
978
979
980
981
982
983
984
985
986
987
988
989
990
991
992
993
994
995
996
997
998
999
1000

```



```

35 # Constrain by macroarea (if != NA) and/or family (if != NA):
getgenera <- function( feature , macroarea=NA, lgfamily=NA )
37 {
  # Select those languages in the given macroarea (if any):
39 langs <- names( na.omit( mat[,feature] ) );
  if( !is.na( macroarea ) )
41 {
    langs <- langs[ lgs$macroarea[ rownames(lgs) %in% langs ] == macroarea ];
43 }
  if( !is.na( lgfamily ) )
45 {
    langs <- langs[ lgs$family[ rownames(lgs) %in% langs ] == lgfamily ];
47 }

49 g <- listGenera( codes=langs ) # list all genera
  if( !is.na( macroarea ) & !is.na( lgfamily ) ) # both constraints
51 {
    count <- sapply( g, function(x){ length( na.omit( mat[ rownames( lgs[ lgs$genus==x \
    ↵ & lgs$macroarea == macroarea & lgs$family == lgfamily, ] ), feature ] ) ) \
    ↵ } ) ) # get genera that are coded more than once
53 } else if( !is.na( macroarea ) ) # only macroarea constraint
  {
    count <- sapply( g, function(x){ length( na.omit( mat[ rownames( lgs[ lgs$genus==x \
    ↵ & lgs$macroarea == macroarea, ] ), feature ] ) ) } ) ) # get genera that \
    ↵ are coded more than once
55 } else if( !is.na( lgfamily ) ) # only family constraint
  {
    count <- sapply( g, function(x){ length( na.omit( mat[ rownames( lgs[ lgs$genus==x \
    ↵ & lgs$family == lgfamily, ] ), feature ] ) ) } ) ) # get genera that are \
    ↵ coded more than once
57 } else # no constraints at all:
  {
    count<-sapply(g,function(x){length(na.omit(mat[rownames(lgs[lgs$genus==x,]), \
    ↵ feature]))}) # get genera that are coded more than once
61 }
63 return( g[ count>1 ] )
  }
65

# Get estimates for P(D) and P(A) for a set of genera g.
67 # First, select a pair of languages from each genus, then compute P(D) and P(A).
# The value can consist either of a single value (A), in which case all the others are \
↵ considered as (non-A); a list of values (A) and all the others are considered (non \
↵ -A); or as a list of values (A) and the non.values contains the list of non-A \
↵ values, with all the others ignored [not yet implemented]
69 getprobs <- function( g, feature, value, macroarea=NA, lgfamily=NA, non.value=NA )
  {
71 # Get a random pair of languages from the same genus, for each genus:
    if( !is.na( macroarea ) & !is.na( lgfamily ) ) # Both constraints:
73 {
      pairs <- lapply( g, function(x){ sample( na.omit( mat[ rownames( lgs[ lgs$genus==x \
      ↵ & lgs$macroarea==macroarea & lgs$family==lgfamily, ] ), feature ] ), 2 ) } \
      ↵ )
75 } else if( !is.na( macroarea ) ) # only macroarea constraint:
  {
    pairs <- lapply( g, function(x){ sample( na.omit( mat[ rownames( lgs[ lgs$genus==x \
    ↵ & lgs$macroarea==macroarea, ] ), feature ] ), 2 ) } )
77 } else if( !is.na( lgfamily ) ) # only family constraint:
  {
    pairs <- lapply( g, function(x){ sample( na.omit( mat[ rownames( lgs[ lgs$genus==x \
    ↵ & lgs$family==lgfamily, ] ), feature ] ), 2 ) } )
79 } else # no constraints:
  {
81 }
  }

```

```

83  pairs <- lapply( g, function(x){ sample( na.omit( mat[ rownames( lgs[lgs$genus==x \
    ↳ ,]), feature | ), 2 ) } )
    }
85
86  # The pA and pD probabilities:
87  pA <- NA;
88  pD <- NA;
89
90  # Compute pD & pA for these pairs:
91  if( is.na(non.value) )
92  {
93    pD <- 1 - ( sum( as.numeric( lapply( pairs, function(x){ ( (x[1] %in% value) \
    ↳ & (x[2] %in% value) ) | ( !(x[1] %in% value) & !(x[2] %in% value) ) \
    ↳ } ) ) ) / length( pairs ) );
94    pA <- sum( as.matrix( as.data.frame( lapply( pairs, function(x){ x %in% value } ) \
    ↳ ) ) ) / ( 2 * length( pairs ) );
95  } else
96  {
97    stop( "No_yet_implemented!\n" );
98  }
99  return( data.frame( "pA"=pA, "pD"=pD ) );
100 }
101
102 # Get estimates for P(D) and P(A) multiple times, and put the results in a table:
103 getcounts <- function( feature, value, cases=50, samplesize=.5, macroarea=NA, lgfamily \
    ↳ =NA, non.value=NA )
104 {
105   result <- data.frame( "pA"=numeric(cases), "pD"=numeric(cases) );
106   g <- getgenera( feature, macroarea, lgfamily );
107
108   for( i in 1:cases )
109   {
110     s <- sample( length(g), floor( samplesize*length(g) ) );
111     result[i,] <- getprobs( g[s], feature, value, macroarea, lgfamily, non.value );
112   }
113   return( result );
114 }
115
116 # Compute the transition probabilities from the output of "getcounts", ie. from the \
    ↳ table with the values of P(D) and P(A):
117 estimates <- function( test, no.simulations=1000, return.summaries=TRUE )
118 {
119   # Regress pD on pA:
120   l <- lm( pD ~ pA, data=test ); # The regression goodness was tested before using \
    ↳ Pearson's r, so don't do it again here!
121
122   # Get the estimated regression coefficients: they have a mean and a standard \
    ↳ distribution:
123   l.summary <- summary( l );
124   if( nrow( l.summary$coefficients ) < 2 )
125   {
126     a.estimate <- NA;
127     a.sd <- NA;
128     b.estimate <- NA;
129     b.sd <- NA;
130   } else
131   {
132     a.estimate <- as.numeric( l.summary$coefficients[2,1] );
133     a.sd <- as.numeric( l.summary$coefficients[2,2] );
134     b.estimate <- as.numeric( l.summary$coefficients[1,1] );
135     b.sd <- as.numeric( l.summary$coefficients[1,2] );
136   }

```

```

137 # Given the complexity of the formulae for pAB and pBA, I cannot derive a formula ↘
    ↪ for their sd, so simulate it:
139 a.simulated <- rnorm( no.simulations, mean=a.estimate, sd=a.sd) / 2;
    b.simulated <- rnorm( no.simulations, mean=b.estimate, sd=b.sd) / 2;
141
142 # And compute the probabilities:
143 pAB.simulated <- (1 + a.simulated - sqrt((1 - a.simulated)^2 - 4*b.simulated))/2;
    pBA.simulated <- (1 - a.simulated - sqrt((1 - a.simulated)^2 - 4*b.simulated))/2;
145 stableA.simulated <- pBA.simulated / (pAB.simulated + pBA.simulated);
    stability.simulated <- 1 - ((pAB.simulated + pBA.simulated)/2);
147
148 # get correlations for estimates
149 correlation <- cor.test( test[,1], test[,2] )
151
152 # Return the results:
153 if( return.summaries == TRUE )
154 {
155   return( list(
156     pApD.cor = as.numeric(correlation$estimate),
157     pApD.sig = correlation$p.value,
158     pAB.mean = mean( pAB.simulated, na.rm=TRUE ),
159     pBA.mean = mean( pBA.simulated, na.rm=TRUE ),
160     stableA.mean = mean( stableA.simulated, na.rm=TRUE ),
161     stability.mean = mean( stability.simulated, na.rm=TRUE ),
162     pAB.sd = ifelse( sum( !is.na( pAB.simulated ) ) <= 1, NA, sd( pAB ↘
    ↪ .simulated, na.rm=TRUE ) ),
163     pBA.sd = ifelse( sum( !is.na( pBA.simulated ) ) <= 1, NA, sd( pBA ↘
    ↪ .simulated, na.rm=TRUE ) ),
164     stableA.sd = ifelse( sum( !is.na( stableA.simulated ) ) <= 1, NA ↘
    ↪ , sd( stableA.simulated, na.rm=TRUE ) ),
165     stability.sd = ifelse( sum( !is.na( stability.simulated ) ) <= 1, ↘
    ↪ NA, sd( stability.simulated, na.rm=TRUE ) )
166   ) );
167 } else
168 {
169   return( data.frame( pAB=pAB.simulated, pBA=pBA.simulated, stableA=stableA. ↘
    ↪ simulated, stability=stability.simulated ) );
170 }
171
172 # Compute the observed frequency of the feature's value in the given macroarea and ↘
    ↪ language family:
173 observed.freq <- function( feature, value, macroarea=NA, lgfamily=NA, non.value=NA )
174 {
175   # Select those languages in the given macroarea (if any):
176   langs <- names( na.omit( mat[ , feature ] ) );
177   if( !is.na( macroarea ) )
178   {
179     langs <- langs[ lgs$macroarea[ rownames(lgs) %in% langs ] == macroarea ];
180   }
181   if( !is.na( lgfamily ) )
182   {
183     langs <- langs[ lgs$family[ rownames(lgs) %in% langs ] == lgfamily ];
184   }
185   values <- na.omit( mat[ rownames(lgs) %in% langs, feature ] );
186   obs.freq <- sum( values %in% value ) / length( values );
187   obs.freq;
188 }
189
190 #####

```

```

#
193 # Compute the stabilities of WALs features using the above estimation techniques
#
195 #####
197 # Features above 138 don't work:
feature.selection <- 1:138
199 value.selection <- unlist ( sapply( feature.selection , function(x) { which( \
↳ featValues[, "feat"] = x ) } ) )

201 # Get the statistics for all features, using 200 samples. The list 'results' is a list \
↳ for all 653 values of the features 1 to 138:
results <- list()
203 for( i in value.selection )
{
205   results[[i]] <- getcounts( featValues[i,1], featValues[i,2], 200 )
}

207 # Get the estimates for all results:
209 all.estimates <- list()
for( i in value.selection )
211 {
  all.estimates[[i]] <- estimates( results[[i]] )
213 }

215 # Extract the list of pAB transition probabilities:
pAB <- unlist( sapply( all.estimates , function(x){ x[3] } ) )
217

# Get the fraction of occurrence of all values per feature: to be used in computing a \
↳ weighted average of the stabilities of each value.
219 # This also nicely gets rid of the nasty problem of values that are only found in very \
↳ few languages: Maslova's approach cannot estimate such groups.
# However, because such groups are small, they are getting a very low weight anyway \
↳ now, so we don't have to worry about their influence:
221 proportion <- c()
for( i in feature.selection )
223 {
  t <- table(mat[,i])
225   proportion <- c( proportion , t/sum(t) )
}

227 # Then we define the stability of a *value* as 1-pAB (i.e. the probability that a \
↳ value to *not* change).
229 # To derive the stability of a *feature* we take the weighted average over these value \
↳ -stabilities: frequent values count more than those with low frequencies:
stability <- xtabs( ( (1-pAB) * proportion ) ~ featValues[ value.selection , 1 ] )
231

# Save this list of feature stabilities to file for later use:
233 write.table( data.frame( "Feat"=as.character( names(stability) ) , "Stability"=as.\
↳ numeric(stability) ) , "Maslova-stabilities.csv", sep="\t", quote=FALSE, row.names \
↳ =FALSE );

```

## References

1. Cysouw M (2011) Understanding transition probabilities. *Linguistic Typology* 15: 415-431.
2. Maslova E (2000) A dynamic approach to the verification of distributional universals. *Linguistic Typology* 4: 307-333.

3. Maslova E (2002) Distributional universals and the rate of type shifts: towards a dynamic approach to "probability sampling". URL <http://another.summa.net/Publications/Sampling.pdf>. Lecture given at the 3rd Winter Typological School, Moscow. Accessed 2012 Dec 26.
4. Maslova E (2004) [Dynamics of typological distributions and stability of language types]. *Voprosy Jazykoznanija* 5: 3-16.
5. Maslova E, Nikitina T (2008) Stochastic universals and dynamics of cross-linguistic distributions: the case of alignment types. URL <http://www.another.summa.net/Publications/ProbabilityPubl.html>. Accessed 2012 Dec 26.
6. Dediu D (2011) A bayesian phylogenetic approach to estimating the stability of linguistic features and the genetic biasing of tone. *Proc R Soc B* 278: 474-479.
7. Felsenstein J (2004) *Inferring phylogenies*. Sinauer Associates Inc.:Sunderland, Mass.
8. Ronquist F (2004) Bayesian inference of character evolution. *Trends Ecol Evol* 19: 475-481.
9. Haspelmath M, Dryer MS, Gil D, Comrie B, editors (2005) *The World Atlas of Language Structures*. Oxford University Press:UK.
